# Supplementary material for: Insulin-like growth factor 1 receptor affects the survival of primary prostate cancer patients depending on TMPRSS2-ERG status
Source: BMC Cancer. 2017 May 25;17:367. doi: 10.1186/s12885-017-3356-8 (PMC5445474; doi:10.1186/s12885-017-3356-8)
Supplement: Supplementary file 1 — IGFBP-3, IGF-1, IGF-1R and INSR RQ values of 270 PCa cases and different T2E-defined molecular subtypes. (XLS 79 kb) [file 12885_2017_3356_MOESM1_ESM.xls]

## Sheet: Total cases
RNA code	IGF-1 mRNA	IGF-1R mRNA	INSR mRNA	IGFBP-3 mRNA
	Log2RQ	Log2RQ	Log2RQ	Log2RQ
R1	3.04	0.194264	0.11	1.60078
R2	0.52	0.620005	0.18	0.153689
R3	2.41	0.544028	0.74	0.653399
R4	0.09	0.410204	0.31	0.544229
R5	4.41	0.971876	1.42	0.352191
R6	0.15	2.21637	0.8	0.163033
R7	0.97	5.03375	1.47	2.15513
R8	1.73	2.13158	1.37	0.802269
R9	0.48	1.58504	1.11	0.620468
R10	0.96	1.77713	1.1	1.39961
R11	0.25	1.40424	0.54	1.18258
R12	1.17	1.70717	0.61	1.20318
R13	0.74	0.487731	0.21	0.215767
R14	1.3	0.641812	0.52	2.66751
R15	0.09	2.3374	0.94	0.21655
R16	0.13	1.32386	1.13	0.422751
R17	0.88	2.26057	1.41	1.32618
R18	0.39	2.15857	0.58	0.144178
R19	0.72	2.53888	1.13	0.300982
R20	0.33	0.733839	0.1	0.51701
R21	3.74	0.655329	0.88	1.38191
R22	1.19	3.32596	0.8	0.393782
R23	0.8	0.483188	0.39	0.988073
R24	0.34	0.525869	0.21	0.243424
R25	50.34	0.207703	nd	0.533787
R26	0.12	0.701026	0.28	0.28516
R27	0.09	1.54229	10.04	1.47468
R28	0.57	0.788602	0.79	1.31314
R29	0.11	0.738321	0.32	0.175037
R30	0.37	1.34094	0.64	0.102206
R31	0.31	0.366049	0.29	0.320067
R32	0.42	2.83147	0.96	0.23833
R33	0.2	0.391313	0.25	0.09286
R34	0.58	0.397925	0.61	0.220408
R35	0.01	1.58056	0.89	0.399658
R36	0.28	0.612124	0.66	1.17786
R37	0.8	1.05123	0.84	0.564215
R38	2.11	1.244	0.2	0.792187
R39	7.61	1.33937	0.64	0.809575
R40	0.32	3.35238	1.15	1.59668
R41	0.33	0.536742	0.4	0.280401
R42	0.21	0.550338	0.76	0.887116
R43	0.27	0.152331	0.11	1.58761
R44	0.31	2.3804	1.55	0.400395
R45	2.75	1.40154	0.56	0.633537
R46	0.5	1.49072	0.61	2.01283
R47	0.51	2.24186	0.61	0.431942
R48	0.73	2.87411	0.93	2.9614
R49	0.87	1.30813	nd	0.534928
R50	17.51	2.24856	0.18	0.669779
R51	0.8	0.823867	0.28	0.521877
R52	0.14	0.311619	0.24	0.317587
R53	0.2	1.40663	0.06	0.35704
R54	0.44	2.48456	0.83	0.0945586
R55	1.57	1.88202	nd	0.596039
R56	0.47	1.39773	0.88	0.521271
R57	0.18	0.827923	0.17	0.156664
R58	0.27	0.384325	0.72	0.464765
R59	3.38	1.6115	0.48	0.867621
R60	0.36	1.43173	0.47	1.32661
R61	0.46	2.51347	0.63	0.243575
R62	0.33	0.647606	0.1	1.22947
R63	2.99	3.62812	0.83	0.83632
R64	1.42	1.26781	0.8	0.685614
R65	0.42	1.29115	1.28	0.398935
R66	1.37	3.68536	2	0.863917
R67	nd	1.73439	0.1	0.437719
R68	0.46	0.949181	0.9	0.341334
R69	0.15	0.421224	0.41	0.194002
R70	0.99	1.07244	1.29	1.70852
R71	3.29	2.87591	2.17	1.53067
R72	1.85	2.2457	0.77	0.794189
R73	0.74	1.05943	0.47	0.384538
R74	1.11	0.646332	0.31	0.166458
R75	0.56	2.03061	1.41	0.725637
R76	0.54	1.71171	0.5	0.988715
R77	1.46	0.302153	0.27	1.74625
R78	1.5	3.91978	1.33	0.808222
R79	0.38	1.09172	0.35	0.435848
R80	0.13	2.06006	0.4	0.487512
R81	2.05	1.64885	1.08	1.08978
R82	0.19	0.890762	1.17	0.317891
R83	0.28	0.483421	0.56	0.179293
R84	0.36	0.411425	0.5	1.28433
R85	0.42	0.6367	0.33	0.339643
R86	0.19	0.254492	0.56	0.216532
R87	0.73	2.99863	0.54	1.11109
R88	1.04	0.286821	0.41	0.143343
R89	0.09	0.242082	0.53	0.13304
R90	0.57	0.669953	1.43	0.317088
R91	1.65	1.36941	0.98	1.19466
R92	0.91	0.470828	0.17	0.856394
R93	0.14	0.92468	1.58	0.214076
R94	0.89	0.435423	0.94	0.442038
R95	0.46	1.23455	0.79	0.398747
R96	0.43	0.204992	0.15	0.214221
R97	0.26	0.0719719	0.1	0.154685
R98	0.28	0.298166	0.05	0.165013
R99	0.78	1.55913	0.65	0.452255
R100	0.28	0.693319	0.35	0.567454
R101	0.34	1.85564	0.99	0.122229
R102	0.42	0.780709	0.69	0.72643
R103	0.79	2.17185	0.78	1.91396
R104	3.41	0.597178	0.27	0.735137
R105	0.19	1.27111	0.83	0.115737
R106	0.58	1.10384	0.71	0.372842
R107	0.43	0.173727	0.29	0.608789
R108	0.2	0.811645	0.37	0.353779
R109	0.44	0.519121	0.64	0.288546
R110	1.43	1.6552	0.73	1.49495
R111	0.14	1.95298	nd	0.170258
R112	0.16	0.265135	0.29	0.13927
R113	0.65	1.59656	0.83	0.0935885
R114	0.56	0.922584	0.54	0.192539
R115	0.4	0.385148	0.62	0.799181
R116	3.17	1.61136	0.6	0.14122
R117	0.79	1.36115	0.74	0.875758
R118	1.52	0.752799	0.49	0.563192
R119	0.18	0.59256	0.17	0.0799541
R120	2.22	2.97396	0.67	0.563871
R121	0.61	0.841581	0.62	0.206996
R122	4.08	2.07668	1.51	1.18601
R123	0.16	0.462285	0.22	0.464646
R124	0.11	0.971671	0.83	0.706679
R125	0.2	1.1366	0.47	0.444796
R126	25.61	1.07963	0.53	0.69575
R127	0.58	1.39819	0.95	2.04711
R128	1.01	2.19013	0.66	0.758951
R129	0.69	0.291755	0.34	0.251441
R130	0.64	1.66956	0.22	1.17009
R131	0.62	0.889764	0.23	1.35645
R132	0.92	1.33737	0.49	0.424018
R133	0.39	2.02502	0.21	0.394678
R134	0.35	0.513479	0.74	1.01625
R135	0.23	0.40625	0.9	0.568925
R136	0.13	0.219743	0.26	0.140046
R137	3.08	0.393195	0.16	1.14292
R138	0.33	1.70796	0.72	0.538868
R139	0.11	0.885725	0.46	0.710933
R140	0.19	1.42807	0.6	0.223918
R141	0.19	0.791914	0.3	0.981962
R142	0.45	0.846157	0.47	0.379105
R143	0.19	0.867739	0.45	1.2267
R144	0.62	1.46039	0.64	1.64924
R145	0.98	2.89327	1.07	0.424989
R146	1.42	0.711572	0.71	0.940441
R147	0.49	2.05256	0.81	0.177399
R148	1.07	2.32068	0.35	0.515462
R149	0.4	1.92356	0.52	0.633977
R150	0.56	0.426085	0.55	0.525589
R151	0.52	1.15577	0.39	0.673714
R152	0.2	0.213745	0.24	1.03556
R153	0.17	0.445917	0.12	0.496356
R154	0.35	0.71618	0.65	0.444151
R155	0.89	2.12852	0.6	1.68253
R156	6.19	1.07233	0.81	0.594131
R157	0.6	0.311548	0.17	0.327447
R158	0.96	1.25536	0.87	0.78375
R159	0.99	0.966473	0.75	0.292089
R160	0.52	0.680939	0.37	0.654561
R161	5.71	4.39753	1.37	1.0476
R162	0.68	1.99767	0.71	0.416627
R163	3.16	1.717	0.56	0.362108
R164	1.2	0.542608	0.52	0.711495
R165	0.81	0.836594	0.49	0.0909331
R166	1.21	1.57405	0.39	0.265549
R167	1.95	1.30931	0.77	0.628911
R168	0.42	0.187218	0.24	0.220918
R169	0.2	1.12745	0.5	0.238638
R170	1.68	0.598336	0.41	1.00311
R171	1.22	1.45462	0.94	1.43055
R172	0.81	0.835715	0.2	1.03716
R173	1.3	4.5993	1.93	0.80885
R174	0.24	0.555079	0.41	0.252592
R175	0.81	1.58636	0.8	0.638712
R176	0.27	1.9212	1.41	0.834153
R177	1.65	0.550873	0.51	1.22396
R178	0.22	0.0897133	0.41	0.444667
R179	0.13	0.881934	0.66	0.491577
R180	1.27	1.5156	1.03	0.486486
R181	1.67	0.479554	0.3	0.14585
R182	2.33	1.5931	0.61	0.698635
R183	1.29	0.854218	1.11	0.656825
R184	0.39	0.290515	0.26	0.235468
R185	1.14	0.792025	0.36	0.762125
R186	0.18	1.73126	0.52	0.968093
R187	0.05	0.325652	0.36	0.464186
R188	1.06	0.901367	0.53	0.231205
R189	1.2	2.87216	1.08	0.630839
R190	0.52	1.10724	1.22	0.0531785
R191	0.45	1.34316	1.06	0.254967
R192	1.16	0.978948	0.15	1.44242
R193	1.49	1.866	0.27	0.382913
R194	0.16	0.46468	0.27	0.514783
R195	0.66	0.584663	0.26	1.43849
R196	0.77	1.25252	0.84	1.08742
R197	1.36	0.58163	0.22	0.471202
R198	6.41	0.414306	0.55	0.268029
R199	0.65	0.302614	0.26	0.109095
R200	0.07	1.01497	0.28	0.432843
R201	0.54	0.461673	0.23	0.332142
R202	1.41	0.791635	0.48	0.325531
R203	0.34	0.624102	0.38	0.594661
R204	0.75	0.932819	0.27	0.437685
R205	0.27	0.563317	0.75	0.192247
R206	0.51	2.89666	0.89	0.318838
R207	0.82	0.365971	0.9	0.458632
R208	0.25	0.378455	0.1	0.560586
R209	0.44	0.853065	0.43	0.745875
R210	0.93	1.28373	0.62	0.80665
R211	1.25	2.71684	1.31	1.08816
R212	0.07	0.162872	0.25	0.224694
R213	0.49	3.83805	1.06	0.345449
R214	0.5	1.45528	0.85	0.40952
R215	0.69	1.15133	0.56	0.19735
R216	0.62	1.37888	0.77	0.521223
R217	0.94	0.816618	0.57	0.851033
R218	0.42	0.570436	0.44	0.262463
R219	3.34	0.725641	0.47	0.547452
R220	0.35	1.85111	0.47	0.436632
R221	0.81	0.740513	0.7	0.387882
R222	0.6	2.71092	0.98	0.445006
R223	1.11	0.983649	1.25	0.702222
R224	2.38	1.50064	0.93	1.1728
R225	1.38	1.28423	0.88	0.479805
R226	0.75	0.246599	0.28	0.946759
R227	0.61	0.996658	0.01	0.747893
R228	0.48	1.08156	0.7	1.133
R229	0.3	0.67781	0.17	0.438151
R230	0.15	1.16525	0.49	0.257907
R231	0.67	1.06194	1.01	0.292176
R232	0.34	0.802399	0.23	0.826517
R233	2.37	1.89894	nd	2.10798
R234	2.26	1.58884	0.83	0.592054
R235	1.12	1.72852	0.59	0.408358
R236	0.2	0.952638	0.8	0.346214
R237	0.96	1.35194	0.77	0.308013
R238	1.67	0.693543	0.96	0.942428
R239	0.19	0.862815	0.54	0.618788
R240	1.45	0.375484	0.48	0.795118
R241	0.73	0.888644	0.41	0.361532
R242	0.83	0.488674	0.36	0.430473
R243	0.99	1.03606	0.59	0.542262
R244	0.65	5.12076	0.34	0.449646
R245	0.54	0.765399	0.18	0.338922
R246	0.72	1.11285	0.81	0.240828
R247	5.4	0.778394	0.34	0.660958
R248	2.15	0.615162	0.16	0.80639
R249	0.57	0.920267	0.77	0.752083
R250	1.62	3.62753	0.75	1.21569
R251	0.59	4.32335	1.94	0.768317
R252	1.4	0.800268	0.5	0.277024
R253	0.59	1.77324	0.63	0.979316
R254	1.04	1.42116	1.24	0.834207
R255	3.27	1.04864	1.37	0.46472
R256	0.9	1.00246	0.72	0.343239
R257	1.2	1.20916	471.75	0.555291
R258	1.44	1.19202	0.43	0.882832
R259	3.15	3.47176	0.67	0.615229
R260	4.88	3.2876	2.02	0.665557
R261	1.66	3.01462	2.51	0.863877
R262	1.16	1.57653	0.95	0.193405
R263	0.19	0.41778	0.27	1.1201
R264	0.22	1.28413	0.62	1.30872
R265	2.92	2.14462	1.27	0.240769
R266	0.63	0.994402	0.79	0.300031
R267	5.05	1.62364	0.16	1.17387
R268	0.32	0.637811	0.3	0.109245
R269	0.67	0.226887	0.41	0.45285
R270	0.99	0.527595	0.31	0.689259
MEDIAN	0.617658	1.04235	0.587622	0.521574
RANGE MIN	0.012295	0.0719719	0.013441	0.0531785
RANGE MAX	50.3436	5.12076	471.746	2.9614
PERCENTILES
25	0.33342	0.596024	0.338958	0.314819
75	1.20572	1.65044	0.835082	0.852373

## Sheet: T2E NEG
RNA code	IGF-1 mRNA	IGF-1R mRNA	INSR mRNA	IGFBP-3 mRNA
	Log2RQ	Log2RQ	Log2RQ	Log2RQ
R1	3.04	0.194264	0.11	1.60078
R2	0.52	0.620005	0.18	0.153689
R3	2.41	0.544028	0.74	0.653399
R6	0.15	2.21637	0.8	0.163033
R7	0.97	5.03375	1.47	2.15513
R10	0.96	1.77713	1.1	1.39961
R11	0.25	1.40424	0.54	1.18258
R13	0.74	0.487731	0.21	0.215767
R14	1.3	0.641812	0.52	2.66751
R15	0.09	2.3374	0.94	0.21655
R18	0.39	2.15857	0.58	0.144178
R20	0.33	0.733839	0.1	0.51701
R21	3.74	0.655329	0.88	1.38191
R23	0.8	0.483188	0.39	0.988073
R24	0.34	0.525869	0.21	0.243424
R25	50.34	0.207703	nd	0.533787
R26	0.12	0.701026	0.28	0.28516
R33	0.2	0.391313	0.25	0.09286
R36	0.28	0.612124	0.66	1.17786
R37	0.8	1.05123	0.84	0.564215
R42	0.21	0.550338	0.76	0.887116
R45	2.75	1.40154	0.56	0.633537
R47	0.51	2.24186	0.61	0.431942
R49	0.87	1.30813	nd	0.534928
R52	0.14	0.311619	0.24	0.317587
R56	0.47	1.39773	0.88	0.521271
R63	2.99	3.62812	0.83	0.83632
R67	nd	1.73439	0.1	0.437719
R70	0.99	1.07244	1.29	1.70852
R73	0.74	1.05943	0.47	0.384538
R79	0.38	1.09172	0.35	0.435848
R81	2.05	1.64885	1.08	1.08978
R82	0.19	0.890762	1.17	0.317891
R84	0.36	0.411425	0.5	1.28433
R86	0.19	0.254492	0.56	0.216532
R92	0.91	0.470828	0.17	0.856394
R96	0.43	0.204992	0.15	0.214221
R97	0.26	0.0719719	0.1	0.154685
R98	0.28	0.298166	0.05	0.165013
R101	0.34	1.85564	0.99	0.122229
R108	0.2	0.811645	0.37	0.353779
R109	0.44	0.519121	0.64	0.288546
R110	1.43	1.6552	0.73	1.49495
R113	0.65	1.59656	0.83	0.0935885
R114	0.56	0.922584	0.54	0.192539
R121	0.61	0.841581	0.62	0.206996
R124	0.11	0.971671	0.83	0.706679
R125	0.2	1.1366	0.47	0.444796
R129	0.69	0.291755	0.34	0.251441
R132	0.92	1.33737	0.49	0.424018
R134	0.35	0.513479	0.74	1.01625
R135	0.23	0.40625	0.9	0.568925
R137	3.08	0.393195	0.16	1.14292
R142	0.45	0.846157	0.47	0.379105
R149	0.4	1.92356	0.52	0.633977
R151	0.52	1.15577	0.39	0.673714
R154	0.35	0.71618	0.65	0.444151
R157	0.6	0.311548	0.17	0.327447
R159	0.99	0.966473	0.75	0.292089
R161	5.71	4.39753	1.37	1.0476
R163	3.16	1.717	0.56	0.362108
R167	1.95	1.30931	0.77	0.628911
R177	1.65	0.550873	0.51	1.22396
R179	0.13	0.881934	0.66	0.491577
R180	1.27	1.5156	1.03	0.486486
R184	0.39	0.290515	0.26	0.235468
R188	1.06	0.901367	0.53	0.231205
R194	0.16	0.46468	0.27	0.514783
R196	0.77	1.25252	0.84	1.08742
R198	6.41	0.414306	0.55	0.268029
R199	0.65	0.302614	0.26	0.109095
R204	0.75	0.932819	0.27	0.437685
R208	0.25	0.378455	0.1	0.560586
R215	0.69	1.15133	0.56	0.19735
R217	0.94	0.816618	0.57	0.851033
R218	0.42	0.570436	0.44	0.262463
R226	0.75	0.246599	0.28	0.946759
R228	0.48	1.08156	0.7	1.133
R229	0.3	0.67781	0.17	0.438151
R231	0.67	1.06194	1.01	0.292176
R233	2.37	1.89894	nd	2.10798
R234	2.26	1.58884	0.83	0.592054
R237	0.96	1.35194	0.77	0.308013
R241	0.73	0.888644	0.41	0.361532
R242	0.83	0.488674	0.36	0.430473
R243	0.99	1.03606	0.59	0.542262
R247	5.4	0.778394	0.34	0.660958
R248	2.15	0.615162	0.16	0.80639
R256	0.9	1.00246	0.72	0.343239
R263	0.19	0.41778	0.27	1.1201
R265	2.92	2.14462	1.27	0.240769
R269	0.67	0.226887	0.41	0.45285
MEDIAN	0.66	0.86	0.54	0.44
RANGE MIN	0.09	0.07	0.05	0.09
RANGE MAX	50.34	5.03	1.47	2.66
PERCENTILES
25	0.33	0.48	0.27	0.27
75	0.99	1.34	0.77	0.85

## Sheet: T2E POS
RNA code	IGF-1 mRNA	IGF-1R mRNA	INSR mRNA	IGFBP-3 mRNA
	Log2RQ	Log2RQ	Log2RQ	Log2RQ
R4	0.09	0.410204	0.31	0.544229
R5	4.41	0.971876	1.42	0.352191
R8	1.73	2.13158	1.37	0.802269
R9	0.48	1.58504	1.11	0.620468
R12	1.17	1.70717	0.61	1.20318
R16	0.13	1.32386	1.13	0.422751
R17	0.88	2.26057	1.41	1.32618
R19	0.72	2.53888	1.13	0.300982
R22	1.19	3.32596	0.8	0.393782
R27	0.09	1.54229	10.04	1.47468
R28	0.57	0.788602	0.79	1.31314
R29	0.11	0.738321	0.32	0.175037
R30	0.37	1.34094	0.64	0.102206
R31	0.31	0.366049	0.29	0.320067
R32	0.42	2.83147	0.96	0.23833
R34	0.58	0.397925	0.61	0.220408
R35	0.01	1.58056	0.89	0.399658
R38	2.11	1.244	0.2	0.792187
R39	7.61	1.33937	0.64	0.809575
R40	0.32	3.35238	1.15	1.59668
R41	0.33	0.536742	0.4	0.280401
R43	0.27	0.152331	0.11	1.58761
R44	0.31	2.3804	1.55	0.400395
R46	0.5	1.49072	0.61	2.01283
R48	0.73	2.87411	0.93	2.9614
R50	17.51	2.24856	0.18	0.669779
R51	0.8	0.823867	0.28	0.521877
R53	0.2	1.40663	0.06	0.35704
R54	0.44	2.48456	0.83	0.0945586
R55	1.57	1.88202	nd	0.596039
R57	0.18	0.827923	0.17	0.156664
R58	0.27	0.384325	0.72	0.464765
R59	3.38	1.6115	0.48	0.867621
R60	0.36	1.43173	0.47	1.32661
R61	0.46	2.51347	0.63	0.243575
R62	0.33	0.647606	0.1	1.22947
R64	1.42	1.26781	0.8	0.685614
R65	0.42	1.29115	1.28	0.398935
R66	1.37	3.68536	2	0.863917
R68	0.46	0.949181	0.9	0.341334
R69	0.15	0.421224	0.41	0.194002
R71	3.29	2.87591	2.17	1.53067
R72	1.85	2.2457	0.77	0.794189
R74	1.11	0.646332	0.31	0.166458
R75	0.56	2.03061	1.41	0.725637
R76	0.54	1.71171	0.5	0.988715
R77	1.46	0.302153	0.27	1.74625
R78	1.5	3.91978	1.33	0.808222
R80	0.13	2.06006	0.4	0.487512
R83	0.28	0.483421	0.56	0.179293
R85	0.42	0.6367	0.33	0.339643
R87	0.73	2.99863	0.54	1.11109
R88	1.04	0.286821	0.41	0.143343
R89	0.09	0.242082	0.53	0.13304
R90	0.57	0.669953	1.43	0.317088
R91	1.65	1.36941	0.98	1.19466
R93	0.14	0.92468	1.58	0.214076
R94	0.89	0.435423	0.94	0.442038
R95	0.46	1.23455	0.79	0.398747
R99	0.78	1.55913	0.65	0.452255
R100	0.28	0.693319	0.35	0.567454
R102	0.42	0.780709	0.69	0.72643
R103	0.79	2.17185	0.78	1.91396
R104	3.41	0.597178	0.27	0.735137
R105	0.19	1.27111	0.83	0.115737
R106	0.58	1.10384	0.71	0.372842
R107	0.43	0.173727	0.29	0.608789
R111	0.14	1.95298	nd	0.170258
R112	0.16	0.265135	0.29	0.13927
R115	0.4	0.385148	0.62	0.799181
R116	3.17	1.61136	0.6	0.14122
R117	0.79	1.36115	0.74	0.875758
R118	1.52	0.752799	0.49	0.563192
R119	0.18	0.59256	0.17	0.0799541
R120	2.22	2.97396	0.67	0.563871
R122	4.08	2.07668	1.51	1.18601
R123	0.16	0.462285	0.22	0.464646
R126	25.61	1.07963	0.53	0.69575
R127	0.58	1.39819	0.95	2.04711
R128	1.01	2.19013	0.66	0.758951
R130	0.64	1.66956	0.22	1.17009
R131	0.62	0.889764	0.23	1.35645
R133	0.39	2.02502	0.21	0.394678
R136	0.13	0.219743	0.26	0.140046
R138	0.33	1.70796	0.72	0.538868
R139	0.11	0.885725	0.46	0.710933
R140	0.19	1.42807	0.6	0.223918
R141	0.19	0.791914	0.3	0.981962
R143	0.19	0.867739	0.45	1.2267
R144	0.62	1.46039	0.64	1.64924
R145	0.98	2.89327	1.07	0.424989
R146	1.42	0.711572	0.71	0.940441
R147	0.49	2.05256	0.81	0.177399
R148	1.07	2.32068	0.35	0.515462
R150	0.56	0.426085	0.55	0.525589
R152	0.2	0.213745	0.24	1.03556
R153	0.17	0.445917	0.12	0.496356
R155	0.89	2.12852	0.6	1.68253
R156	6.19	1.07233	0.81	0.594131
R158	0.96	1.25536	0.87	0.78375
R160	0.52	0.680939	0.37	0.654561
R162	0.68	1.99767	0.71	0.416627
R164	1.2	0.542608	0.52	0.711495
R165	0.81	0.836594	0.49	0.0909331
R166	1.21	1.57405	0.39	0.265549
R168	0.42	0.187218	0.24	0.220918
R169	0.2	1.12745	0.5	0.238638
R170	1.68	0.598336	0.41	1.00311
R171	1.22	1.45462	0.94	1.43055
R172	0.81	0.835715	0.2	1.03716
R173	1.3	4.5993	1.93	0.80885
R174	0.24	0.555079	0.41	0.252592
R175	0.81	1.58636	0.8	0.638712
R176	0.27	1.9212	1.41	0.834153
R178	0.22	0.0897133	0.41	0.444667
R181	1.67	0.479554	0.3	0.14585
R182	2.33	1.5931	0.61	0.698635
R183	1.29	0.854218	1.11	0.656825
R185	1.14	0.792025	0.36	0.762125
R186	0.18	1.73126	0.52	0.968093
R187	0.05	0.325652	0.36	0.464186
R189	1.2	2.87216	1.08	0.630839
R190	0.52	1.10724	1.22	0.0531785
R191	0.45	1.34316	1.06	0.254967
R192	1.16	0.978948	0.15	1.44242
R193	1.49	1.866	0.27	0.382913
R195	0.66	0.584663	0.26	1.43849
R197	1.36	0.58163	0.22	0.471202
R200	0.07	1.01497	0.28	0.432843
R201	0.54	0.461673	0.23	0.332142
R202	1.41	0.791635	0.48	0.325531
R203	0.34	0.624102	0.38	0.594661
R205	0.27	0.563317	0.75	0.192247
R206	0.51	2.89666	0.89	0.318838
R207	0.82	0.365971	0.9	0.458632
R209	0.44	0.853065	0.43	0.745875
R210	0.93	1.28373	0.62	0.80665
R211	1.25	2.71684	1.31	1.08816
R212	0.07	0.162872	0.25	0.224694
R213	0.49	3.83805	1.06	0.345449
R214	0.5	1.45528	0.85	0.40952
R216	0.62	1.37888	0.77	0.521223
R219	3.34	0.725641	0.47	0.547452
R220	0.35	1.85111	0.47	0.436632
R221	0.81	0.740513	0.7	0.387882
R222	0.6	2.71092	0.98	0.445006
R223	1.11	0.983649	1.25	0.702222
R224	2.38	1.50064	0.93	1.1728
R225	1.38	1.28423	0.88	0.479805
R227	0.61	0.996658	0.01	0.747893
R230	0.15	1.16525	0.49	0.257907
R232	0.34	0.802399	0.23	0.826517
R235	1.12	1.72852	0.59	0.408358
R236	0.2	0.952638	0.8	0.346214
R238	1.67	0.693543	0.96	0.942428
R239	0.19	0.862815	0.54	0.618788
R240	1.45	0.375484	0.48	0.795118
R244	0.65	5.12076	0.34	0.449646
R245	0.54	0.765399	0.18	0.338922
R246	0.72	1.11285	0.81	0.240828
R249	0.57	0.920267	0.77	0.752083
R250	1.62	3.62753	0.75	1.21569
R251	0.59	4.32335	1.94	0.768317
R252	1.4	0.800268	0.5	0.277024
R253	0.59	1.77324	0.63	0.979316
R254	1.04	1.42116	1.24	0.834207
R255	3.27	1.04864	1.37	0.46472
R257	1.2	1.20916	471.75	0.555291
R258	1.44	1.19202	0.43	0.882832
R259	3.15	3.47176	0.67	0.615229
R260	4.88	3.2876	2.02	0.665557
R261	1.66	3.01462	2.51	0.863877
R262	1.16	1.57653	0.95	0.193405
R264	0.22	1.28413	0.62	1.30872
R266	0.63	0.994402	0.79	0.300031
R267	5.05	1.62364	0.16	1.17387
R268	0.32	0.637811	0.3	0.109245
R270	0.99	0.527595	0.31	0.689259
MEDIAN	0.61	1.22	0.61	0.55
RANGE MIN	0.01	0.08	0.01	0.05
RANGE MAX	25.61	5.12	471.75	2.96
PERCENTILES
25	0.32	0.69	0.35	0.33
75	1.22	1.85	0.9	0.84
